# Supplementary material
Source: ML conference proceedings conference paper supplement (https://proceedings.mlr.press/v97/kalimeris19a.html)
Supplement: Supplementary file [file kalimeris19a-supp.pdf]

## A. Omitted Proofs

### A.1. Proof of Lemma 1

*Proof.* Denote the solutions to the two different objectives as follows:  $\hat{S}_r = \arg \max_{S: |S| \leq k} \min_{\mathbf{p} \in \mathcal{P}} \frac{f_{\mathbf{p}}(S)}{f_{\mathbf{p}}(S_{\mathbf{p}}^*)}$  and  $\hat{S}_v = \arg \max_{S: |S| \leq k} \min_{\mathbf{p} \in \mathcal{P}} f_{\mathbf{p}}(S)$ .

We will prove the lemma by contradiction. Specifically, let's assume that there exists a set of influence functions  $\mathcal{P}$  for which  $\min_{\mathbf{p}} f_{\mathbf{p}}(\hat{S}_r) < \frac{1}{\sqrt{n}} \min_{\mathbf{p}} f_{\mathbf{p}}(\hat{S}_v)$ , i.e. for this  $\mathcal{P}$ , the solution for the robust ratio objective is suboptimal with respect to the total number of nodes influenced by a factor greater than  $\sqrt{n}$ .

To ease the notation let us denote with  $f_r$  the function that achieves

Hence it holds:

$$\begin{aligned} \sqrt{n} \cdot f_r(\hat{S}_r) &= \sqrt{n} \cdot \min_{\mathbf{p}} f_{\mathbf{p}}(\hat{S}_r) \\ &< \min_{\mathbf{p}} f_{\mathbf{p}}(\hat{S}_v) = f_v(\hat{S}_v) \leq f_r(\hat{S}_v) \end{aligned} \quad (3)$$

where the last inequality is due to the minimality of  $f_v$ . Let us denote with  $f_m$  the function that has the minimum ratio for  $\hat{S}_v$ . That is,  $\frac{f_m(\hat{S}_v)}{f_m(S_m^*)} = \min_{\mathbf{p}} \frac{f_{\mathbf{p}}(\hat{S}_v)}{f_{\mathbf{p}}(S_{\mathbf{p}}^*)}$ . Then,

$$\begin{aligned} \frac{1}{\sqrt{n}} &> \frac{f_r(\hat{S}_r)}{f_r(\hat{S}_v)} \geq \frac{f_r(\hat{S}_r)}{f_r(S_r^*)} \\ &= \max_S \min_{\mathbf{p}} \frac{f_{\mathbf{p}}(S)}{f_{\mathbf{p}}(S_{\mathbf{p}}^*)} \geq \min_{\mathbf{p}} \frac{f_{\mathbf{p}}(\hat{S}_v)}{f_{\mathbf{p}}(S_{\mathbf{p}}^*)} = \frac{f_m(\hat{S}_v)}{f_m(S_m^*)} \end{aligned} \quad (4)$$

where the last inequality holds due to the maximality of  $\hat{S}_r$ . Now we can prove a contradiction as follows:

$$\begin{aligned} f_m(S_m^*) &> \sqrt{n} \cdot f_m(\hat{S}_v) \geq \sqrt{n} \cdot f_v(\hat{S}_v) \\ &> n \cdot f_r(\hat{S}_r) \geq n \end{aligned}$$

The first inequality is due to (4), the second is due to the fact that  $f_v(\hat{S}_v) = \arg \min_{\mathbf{p}} f_{\mathbf{p}}(\hat{S}_v)$ , while the third is from (3). Finally, since  $|\hat{S}_r| \geq 1$  the influence function is also at least 1 (at least all the nodes in  $\hat{S}_r$  get influenced).

Now notice that the influence of any set of nodes cannot be more than  $n$  and as a result we have a contradiction. Thus,  $\min_{\mathbf{p}} f_{\mathbf{p}}(\hat{S}_r) \geq \frac{1}{\sqrt{n}} \min_{\mathbf{p}} f_{\mathbf{p}}(\hat{S}_v)$ .

The graph in Figure 2 shows that there exist a set  $\mathcal{P}$  for which  $\min_{\mathbf{p}} f_{\mathbf{p}}(\hat{S}_r) = \Omega\left(\frac{1}{\sqrt{n}}\right) \min_{\mathbf{p}} f_{\mathbf{p}}(\hat{S}_v)$  which concludes the proof.  $\square$

### A.2. Proof of Lemma 3

Consider a cycle on  $n$  nodes, connected with edges of diffusion probability  $1 - \lambda$ , and an additional center node  $v^*$  that is connected to all the nodes of the cycle. Notice that the number of edges is  $m = 2n$ . To consider the Lipschitzness of the influence function on this graph we consider the change in the influence of  $v^*$  in case that the probabilities connecting it to the cycle are all  $\lambda$  and the case in which they are all  $\epsilon = n \cdot \lambda$ .

The influence of  $v^*$  in the first case is at most  $n(1 - (1 - \lambda)^n)$ . For sufficiently large  $n$ :

$$(1 - \lambda)^n = \left(1 - \frac{n\lambda}{n}\right)^n \approx e^{-n\lambda} \approx 1 - n\lambda$$

So, the influence is at most  $n^2\lambda = n\epsilon$ . Once the probabilities on edges connecting it to the cycle increase from  $\lambda$  to  $\epsilon$  its expected influence becomes at least  $n(1 - (1 - \epsilon)^n)(1 - \lambda)^n$ . Using the same approximation as before for sufficient large  $n$ , we get that the influence of  $v^*$  is at least  $n^2\epsilon(1 - n\lambda) = n^2\epsilon(1 - \epsilon) = n^2\epsilon - n^2\epsilon^2$ .

Then,  $|f_{\mathbf{p}}(v^*) - f_{\mathbf{p}'}(v^*)| = n^2\epsilon - n^2\epsilon^2 - n\epsilon$ . After setting  $\epsilon = \frac{1}{n}$ , this bound becomes  $n^2\epsilon - 2n\epsilon = (n\frac{m}{2} - 2n)\epsilon$ . Thus, for small  $\epsilon$  the Lipschitz constant is asymptotically achieved with  $n$ .

Notice that this example can be simplified if we use probabilities of 1 in the cycle, and 0 and  $\epsilon$  in the connections of  $v^*$ . The reason why we avoided the values 0, 1 is because for some generalized linear models, e.g. in the logistic or the probit model the values of the probabilities are strictly in  $(0, 1)$  instead of  $[0, 1]$ .

### A.3. Proof of Lemma 5

In Definition 2 we defined an  $\epsilon$ -cover of  $\mathcal{F}$  as a set  $\mathcal{F}_\epsilon \subset \mathcal{F}$  s.t. for any  $f_\theta \in \mathcal{F}$  there exists a function  $f_j \in \mathcal{F}_\epsilon$  such that  $|f_\theta(S) - f_j(S)| \leq \epsilon$  for all  $S \subseteq V$ . Using this definition we can proceed as follows:

$$\begin{aligned} \forall S \subseteq V, \forall f_\theta \in \mathcal{F}, \exists f_j \in \mathcal{F}_\epsilon : |f_\theta(S) - f_j(S)| &\leq \epsilon \\ \Rightarrow -\min_{f_\theta \in \mathcal{F}} f_\theta(S) + f_j(S) &\leq \epsilon \\ \Rightarrow \min_{f_\theta \in \mathcal{F}} f_\theta(S) &\geq \min_{f_i \in \mathcal{F}_\epsilon} f_i(S) - \epsilon \end{aligned}$$

Simultaneously it holds that:

$$\forall S \subseteq V, \min_{f_i \in \mathcal{F}_\epsilon} f_i(S) - \min_{f_\theta \in \mathcal{F}} f_\theta(S) \geq 0$$

since  $\mathcal{F}_\epsilon \subset \mathcal{F}$ . Let  $S^* = \arg \max_{S: |S| \leq k} \min_{f_\theta \in \mathcal{F}} f_\theta(x)$  and  $S_\epsilon^* = \arg \max_{S: |S| \leq k} \min_{f_i \in \mathcal{F}_\epsilon} f_i(x)$ . Then it is:

$$\begin{aligned} & \min_{f_i \in \mathcal{F}_\epsilon} f_i(S_\epsilon^*) - \min_{f_\theta \in \mathcal{F}} f_\theta(S^*) \geq \\ & \min_{f_i \in \mathcal{F}_\epsilon} f_i(S^*) - \min_{f_\theta \in \mathcal{F}} f_\theta(S^*) \geq 0 \\ \Rightarrow & \max_{S: |S| \leq k} \min_{f_i \in \mathcal{F}_\epsilon} f_i(S) \geq \max_{S: |S| \leq k} \min_{f_\theta \in \mathcal{F}} f_\theta(S) \end{aligned}$$

Hence, utilizing an algorithm that guarantees an  $\hat{S} \subseteq V$  such that:

$$\min_{f_i \in \mathcal{F}_\epsilon} f_i(\hat{S}) \geq \alpha \cdot \max_{S: |S| \leq k} \min_{f_i \in \mathcal{F}_\epsilon} f_i(S)$$

we get that for the family  $\mathcal{F}$  it holds:

$$\min_{f_\theta \in \mathcal{F}} f_\theta(\hat{S}) \geq \alpha \cdot \max_{S: |S| \leq k} \min_{f_\theta \in \mathcal{F}} f_\theta(S) - \epsilon.$$

□

## B. Lower Bound

We build a similar reduction to the one in (He & Kempe, 2016), reducing from is GAP SET COVER.

In a SET COVER instance we have a universe elements  $U = \{u_1, u_2, \dots, u_\ell\}$  and a collection of subsets of  $U$ ,  $\mathcal{T} = \{T_1, T_2, \dots, T_M\}$ , where  $T_i \subseteq U$  for all  $i \in [M]$ . The goal is to find a cover  $C \subseteq \mathcal{T}$  such that  $\cup_{T \in C} T = U$  and the size of  $C$  is minimized. In the decision version of the problem we are also given an integer  $k$  and we are asked whether the optimal solution has value  $|C| \leq k$  or  $|C| > k$ . The GAP SET COVER is a slightly stronger problem that asks whether there is a solution  $C$  such that  $|C| \leq k$  or  $|C| > (1 - \delta) \log Nk$ , for any  $\delta \in (0, 1)$ . We will assume that  $k \leq \min\{M, \ell\}$ , otherwise we can always find the optimal solution by simply picking all the elements of  $\mathcal{T}$  or at least one set per element of  $U$  that contains it (assuming that a set cover exists, such a set always exists as well). Both problems are NP-hard as proved in (Karp, 1972) and (Dinur & Steurer, 2014).

For any given instance of GAP SET COVER we construct an instance of robust influence maximization (RIM) by constructing a graph on  $n$  nodes, and  $\ell$  different influence functions. The goal is to maximize the influence with respect to the worse influence function. Each influence function is associated with a different set of diffusion probabilities. We will prove that if we can find a seed set that is a better than  $\frac{1}{n^{1-\epsilon}}$ -approximation to the maximin solution of this RIM problem, then we can solve gap set cover.

We construct the following bipartite graph with vertex set  $V = A \cup B$ . The set  $A$  contains exactly  $M$  nodes, one node  $a_T$  for each  $T, i \in [M]$ . The set  $B$  contains  $m$  nodes ( $m$  to be fixed later in the proof) for each element  $u \in U$ :  $\{b_{u1}, b_{u2}, \dots, b_{um}\}$ , so  $m\ell$  nodes in total. The total number of nodes in the graph is  $n = M + m\ell$ .

We create the edges of the graph according to the the set cover solution  $C$ . For every  $T \in C$  we add the directed edges from  $a_T$  to  $\{b_{u1}, b_{u2}, \dots, b_{um}\}$  for all  $u \in T$ . That is  $m|T|$  edges per element  $T \in C$ .

Each influence function induces different probabilities on the edges. We have  $\ell$  functions. For the  $u^{th}$  function, set the probability of the edges  $\{(a_T, b_{u1}), (a_T, b_{u2}), \dots, (a_T, b_{um})\}$  for which  $u \in T$  to  $1 - \lambda$  and the probability of the rest of the edges to  $\lambda$ .

There are two cases:  $|C| \leq k$  and  $|C| > (1 - \delta) \ln \ell k$ . Let us focus on the case where  $|C| \leq k$  first. One can easily see that if we choose the  $a_T$ s for which  $T \in C$  as seeds, we can achieve expected diffusion of at least  $|C| + (1 - \lambda)m$  on each of the  $\ell$  influence functions due to the fact that every  $j \in [\ell]$ ,  $u_j$  is covered by the solution  $C$ , i.e. there exists  $T$  such that  $u_j \in T$ . Thus, in this case  $\max_S \min_{j \in [\ell]} f_j(S) \geq |C| + (1 - \lambda)m$ .

In the second case, there is no cover of size at most  $(1 - \delta) \ln \ell k$ . However, we are allowed to choose at most  $(1 - \delta) \ln \ell k$  as seeds. Hence, for any choice of seeds there is definitely an element  $u_j \in U$  that is not covered. As a result, for the  $j^{th}$  influence function the expected number of influenced nodes is at most  $(1 - \delta) \ln \ell k \cdot (1 + m(\ell - 1)\lambda)$ . That is because each node is connected to at most  $m(\ell - 1)\lambda$  other nodes (since it is definitely not connected to  $u_j$ ) and there are no high probability edges that are triggered in this function. As a result  $\max_S \min_{j \in [\ell]} f_j(S) \leq (1 - \delta) \ln \ell k \cdot (1 + m(\ell - 1)\lambda)$ .

We want to be able to distinguish between the first and the second case, i.e. the case where  $\max_S \min_{j \in [\ell]} f_j(S) \geq |C| + (1 - \lambda)m$  and when  $\max_S \min_{j \in [\ell]} f_j(S) \leq (1 - \delta) \ln \ell k \cdot (1 + m(\ell - 1)\lambda)$ . To this end, we consider the ratio:  $\frac{(1 - \delta) \ln \ell k (1 + m(\ell - 1)\lambda)}{|C| + (1 - \lambda)m}$  which we want to prove that is less than  $\frac{1}{n^{1-\epsilon}}$  for any  $\epsilon > 0$ . Remember that for the number of nodes in the graph it holds  $n = M + m\ell$ .

Hence, if  $\frac{|C| + (1 - \lambda)m}{n^{1-\epsilon}} > (1 - \delta) \ln \ell k (1 + m(\ell - 1)\lambda)$  we will be able to separate the two cases.

First assume  $\min\{M, \ell\} = \ell$ :

$$\begin{aligned} \frac{|C| + (1 - \lambda)m}{(M + m\ell)^{1-\epsilon}} & \geq (1 - \lambda) \frac{1 + m}{((1 + m)M)^{1-\epsilon}} \\ & \geq (1 - \lambda) \frac{m^\epsilon}{M^{1-\epsilon}} \end{aligned}$$

Now for  $m = M^{3/\epsilon}$ ,  $\lambda = 1/m$  we have that as  $M$  grows

$$\left(1 - \frac{1}{m}\right) \frac{m^\epsilon}{M^{1-\epsilon}} > (1 - \delta) M^{2+\epsilon} >$$

$$(1 - \delta) M^2 \ln M$$

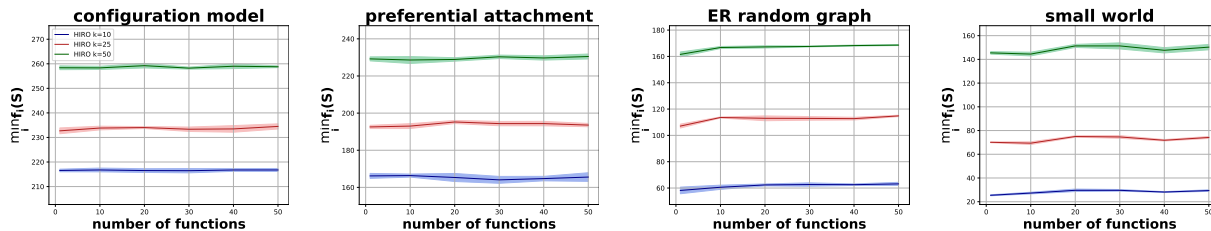

Figure 6. Number of functions needed to cover the Hyperparameter’s space.

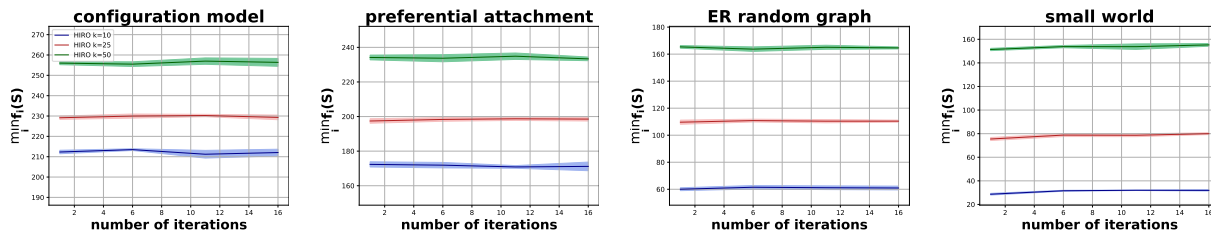

Figure 7. Speed of convergence of HIR0 for multiple seed set sizes.

which is asymptotically larger than  $(1 - \delta) \ln \ell k(1 + m(\ell - 1)\lambda)$ . Choosing  $m = \ell^{3/\epsilon}$  solves the other case. Hence setting  $m = (\max\{M, \ell\})^{3/\epsilon}$  and  $\lambda = 1/m$  completes the reduction. Hence, if we have a better than  $\frac{1}{n^{1-\epsilon}}$ -approximation algorithm for robust influence maximization then we can solve gap set cover.

to create a graph with 100-250 vertices and edges with probability  $p = 3/n$ .  $G(n, m)$  does not capture some of the properties of real social networks, however it is a very impactful model with variety of applications in several areas of science.

### C. Omitted Details from Experiments

**Synthetic Graphs:** As we discussed in Section 6 different graph models yield graphs with different topological properties. The ones we selected for our experiments are the following:

- *Small-World network:* In this model most nodes are not neighbors of one another, but the path from each node to another is short. Specifically we use the Watts-Strogatz model that is known for its high clustering coefficient and small diameter properties. Each node is connected to 5 nodes in the ring topology and the probability of rewiring an edge is  $1/n$  where  $n$  is the number of nodes in the graph. We work with graphs of sizes 100-250.
- *Preferential Attachment (Barabási-Albert):* The degree distribution of this model is a power law and hence captures interesting properties of the real-world social networks. We took 2 initial vertices and added 2 edges at each step, using the preferential attachment model, until we reached 100-250 vertices.
- *Configuration model:* The configuration model allows us to construct a graph with a given degree distribution. We chose 100-250 vertices and a power-law degree distribution with parameter  $\alpha = 2$ .
- *Erdős-Rényi:* We used the celebrated  $G(n, m)$  model
